# Supplementary material for: Chiral tandem modifiers: highly efficient cinchonidine-derivative modifiers at low concentrations for the enantioselective hydrogenation of (E)-2,3-diphenylpropenoic acid over Pd/C
Source: Royal Society of Chemistry journal article supplement (doi:10.1039/d2cy01695h), 2022-01-01
Supplement: d2cy01695h1.pdf [file d2cy01695h1.pdf]

## Supplementary Information

### Chiral Tandem Modifiers: Highly Efficient Cinchonidine-Derivative Modifiers at Low Concentrations for the Enantioselective Hydrogenation of (*E*)-2,3-Diphenylpropenoic acid over Pd/C

Takuya Mameda, Mio Shimogaki, Yasuaki Okamoto,\* Takashi Sugimura\*

Graduate School of Material Science, University of Hyogo, Kohto, Kamigori, Hyogo  
678-1297, Japan

### Supplementary Figures

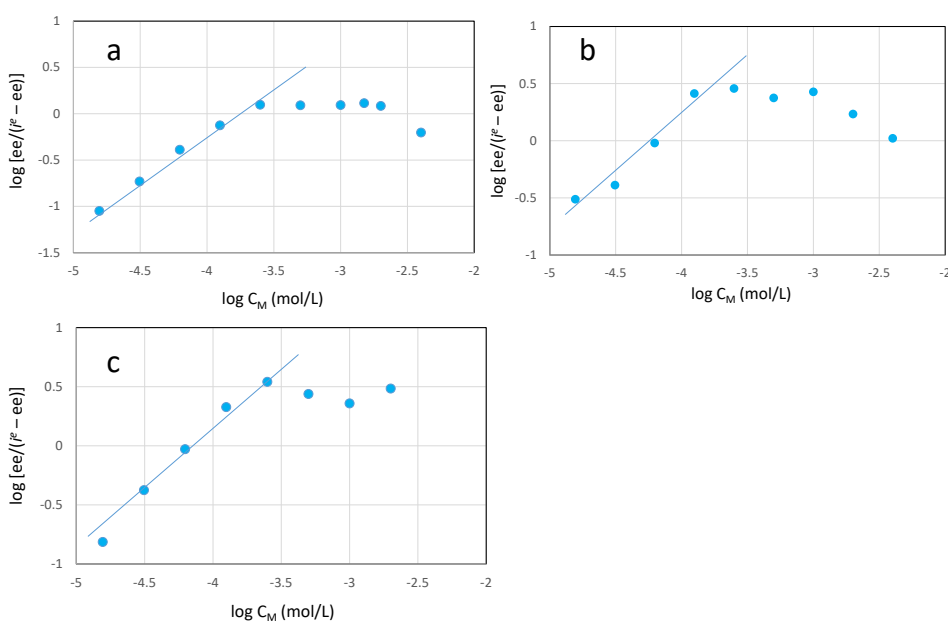

Figure S1. Correlation between  $\log [ee/(i^e - ee)]$  and  $\log C_M$  for (a) C2-Q2, (b) C6-Q2, and (c) C18-Q2. The slope of the linear line in the plot is set to unity according to eqn. (6). The values of  $i^e$  and  $\log \beta$  obtained from the analysis are listed in Table 1.

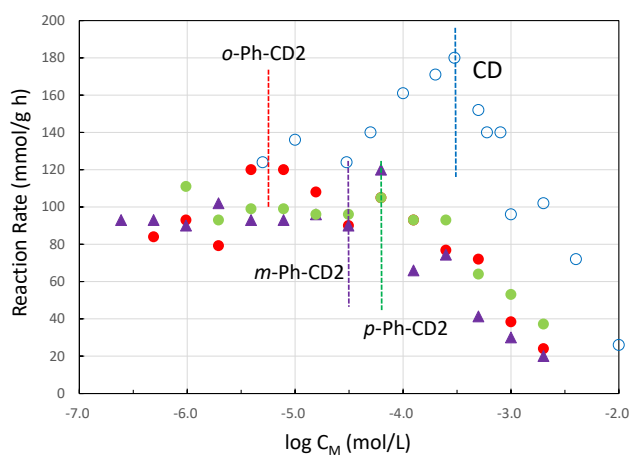

Figure S2. The initial reaction rates of the PCA hydrogenation over Pd/C modified with *o*-Ph-CD2 (●), *m*-Ph-CD2 (▲), and *p*-Ph-CD2 (●) as a function of  $\log C_M$ . The initial reaction rate of CD-Pd/C (○) is shown for comparison.<sup>53</sup> The dotted vertical line indicates plausible  $\log C_M^*$  for each modifier.

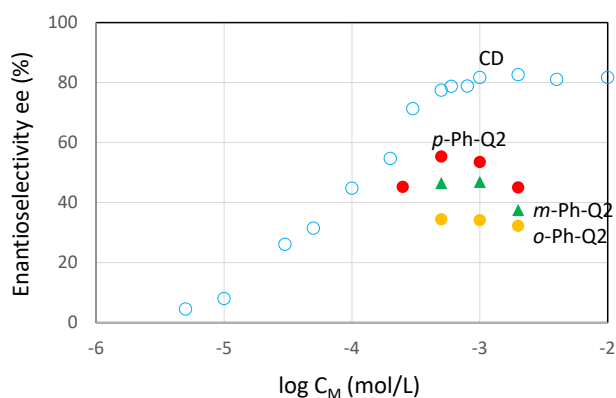

Figure S3. Enantioselectivity, as expressed by ee %, as a function of  $\log C_M$  for the asymmetric hydrogenation of PCA over Pd/C modified with *o*-Ph-Q2 (●), *m*-Ph-Q2 (▲), and *p*-Ph-Q2 (●). The enantioselectivity of CD-Pd/C (○) is cited from the previous study<sup>53</sup> for comparison.

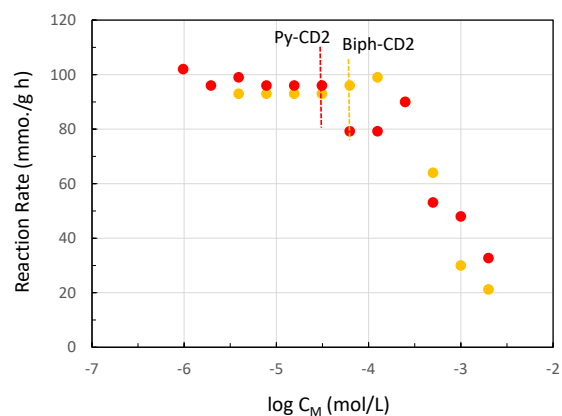

Figure S4. The initial reaction rates of the PCA hydrogenation over Pd/C modified with Py-CD2 (●) and Biph-CD2 (●) as a function of  $\log C_M$ . The dotted vertical line indicates plausible  $\log C_M^*$  for each modifier.

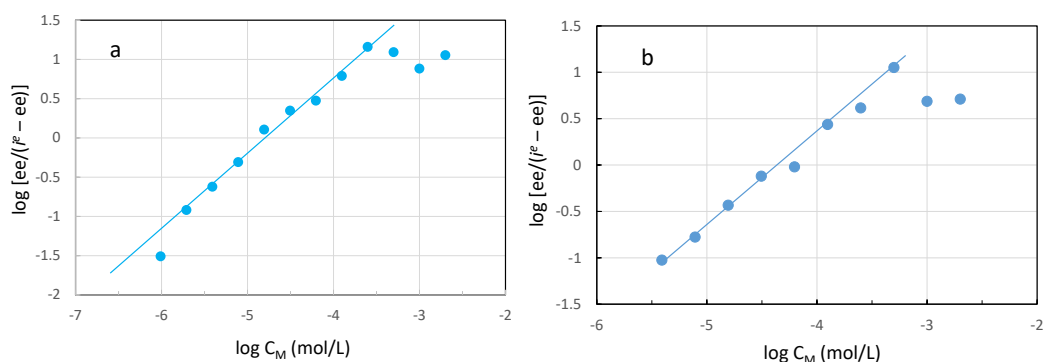

Figure S5. Correlation between  $\log [ee/(i^e - ee)]$  and  $\log C_M$  for (a) Py-Q2 and (b) Biph-Q2. The slope of the linear line in the plot is set to unity according to eqn. (6). The values of  $i^e$  and  $\log \beta$  obtained from the analysis are listed in Table 2.

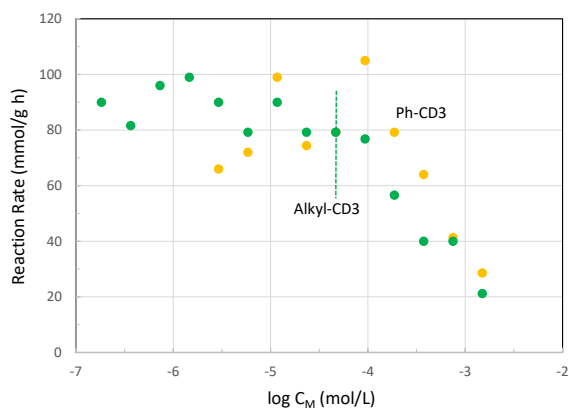

Figure S6. The initial reaction rates of the PCA hydrogenation over Pd/C modified with Alkyl-CD3 (●) and Ph-CD3 (●) as a function of  $\log C_M$ . The dotted vertical line indicates plausible  $\log C_M^*$  for Alkyl-CD3.

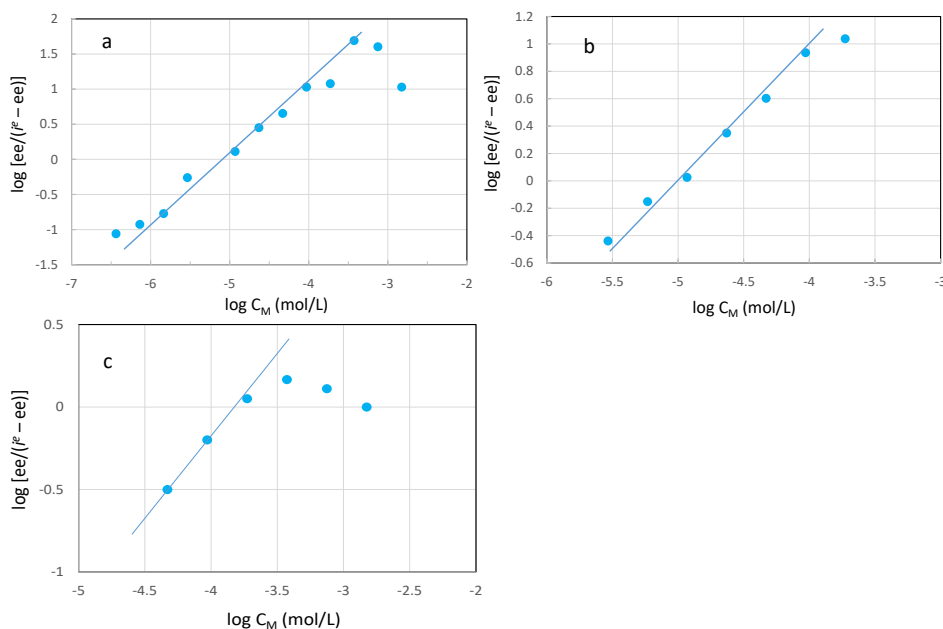

Figure S7. Correlation between  $\log [ee/(i^e - ee)]$  and  $\log C_M$  for (a) Alkyl-CD3, (b) Ph-CD3, and (c) Ph-Q3. The slope of the linear line in the plot is set to unity according to eqn. (6). The values of  $i^e$  and  $\log \beta$  obtained from the analysis are listed in Table 3.

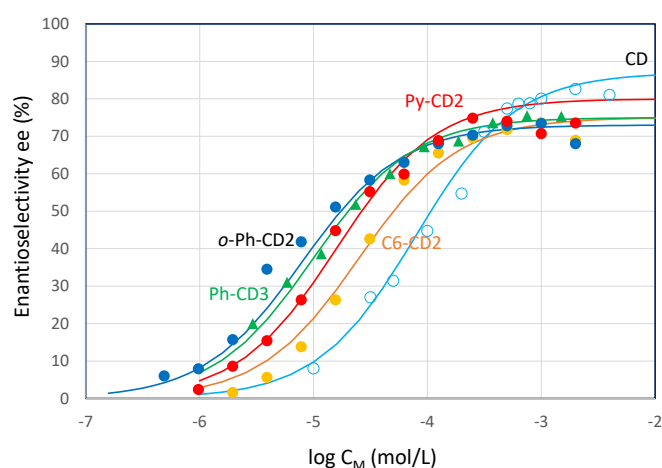

Figure S8. Enantioselectivity, as expressed by ee %, as a function of  $\log C_M$  for the asymmetric hydrogenation of PCA over Pd/C modified with *o*-Ph-CD2 (●), Ph-CD3 (▲), Py-CD2 (●), and C6-CD2 (●). The enantioselectivity of CD-Pd/C (○) is cited from the previous study<sup>53</sup> for comparison.

### Chemical Data of the tandem modifiers

The  $^1\text{H}$ -NMR and high resolution mass spectrometry data of the tandem modifiers synthesized in the present study are compiled here. The symbols of the tandem modifiers employed in Schemes 3-8 are used for simplicity.

Proton NMR spectra were measured on a JEOL JNM-ECZ600R spectrometer as solutions in  $\text{CDCl}_3$ . Proton NMR spectra were recorded using the residual  $\text{CHCl}_3$  as internal reference (7.24 ppm). Data were reported as follow: chemical shifts, integration, multiplicity (s = singlet, d = doublet, t = triplet, ddd = doublet of doublet of doublet, dd = doublet of doublet, td = triplet of doublet, m = multiplet, and br = broad), coupling constants (Hz), and assignment. High performance liquid chromatography (HPLC) was performed on a HPLC system containing of the following: pump, Jasco PU-2080 Plus; detector, Jasco UV-2075 Plus; column, Daicel CHIRALPAK IC-3 4.6 mm  $\times$  25 cm column. High-resolution mass spectra (HRMS) were measured on Thermo SCIENTIFIC Exactive Plus.

#### Scheme 3

##### C2-CD2

$^1\text{H}$  NMR (600 MHz,  $\text{CDCl}_3$ )  $\delta$  8.08 (d,  $J = 7.6$  Hz, 2H), 8.02 (d,  $J = 7.6$  Hz, 2H), 7.64 (t,  $J = 7.6$  Hz, 2H), 7.46 (t,  $J = 7.6$  Hz, 2H), 7.10 (s, 2H), 5.66 (dt,  $J = 17.2, 9.0$  Hz, 2H), 5.46–5.41 (m, 2H), 4.92 (d,  $J = 17.2$  Hz, 2H), 4.90 (d,  $J = 9.0$  Hz, 2H), 3.56–3.44 (m, 4H), 3.26–3.12 (m, 2H), 3.10–2.98 (m, 4H), 2.61–2.53 (m, 2H), 2.51–2.41 (m, 2H), 2.27–2.17 (m, 2H), 1.74–1.33 (m, 10H); HRMS (ESI)  $m/z$  calcd for  $\text{C}_{40}\text{H}_{47}\text{N}_4\text{O}_2^+$  ( $[\text{M} + \text{H}]^+$ ) 615.3694, found:  $m/z$ : 615.3688.

##### C6-CD2

$^1\text{H}$  NMR (600 MHz,  $\text{CDCl}_3$ )  $\delta$  8.15–8.03 (br, 2H), 8.00 (d,  $J = 7.6$  Hz, 2H), 7.60 (t,  $J = 7.6$  Hz, 2H), 7.43 (t,  $J = 7.6$  Hz, 2H), 7.42 (d,  $J = 7.6$  Hz, 2H), 5.71 (dt,  $J = 17.2, 9.0$  Hz, 2H), 5.66–5.57 (m, 2H), 4.93 (d,  $J = 17.2$  Hz, 2H), 4.88 (d,  $J = 10.3$  Hz, 2H), 3.57–3.42 (m, 2H), 3.23–3.10 (m, 2H), 3.06 (dd,  $J = 14.5, 11.7$  Hz, 2H), 2.72–2.51 (m, 8H), 2.28–2.18 (m, 2H), 1.86–1.35 (m, 18H); HRMS (ESI)  $m/z$  calcd for  $\text{C}_{44}\text{H}_{55}\text{N}_4\text{O}_2^+$  ( $[\text{M} + \text{H}]^+$ ) 671.4320, found:  $m/z$ : 671.4320.

##### C7-CD2

$^1\text{H}$  NMR (600 MHz,  $\text{CDCl}_3$ )  $\delta$  8.04 (d,  $J = 8.3$  Hz, 2H), 7.66 (d,  $J = 8.3$  Hz, 2H), 7.57 (s, 2H), 7.20 (t,  $J = 8.3$  Hz, 2H), 6.95 (t,  $J = 8.3$  Hz, 2H), 6.35 (s, 2H), 6.24–6.07 (br, 2H), 5.50 (ddd,  $J = 17.2, 11.0, 6.9$  Hz, 2H), 4.96 (d,  $J = 17.2$  Hz, 2H), 4.96 (d,  $J = 11.0$  Hz, 2H), 4.48–4.37 (m, 2H), 3.42 (t,  $J = 12.4$

Hz, 2H), 3.28 (t,  $J = 9.0$  Hz, 2H), 3.13–2.99 (m, 4H), 2.90 (t,  $J = 7.6$  Hz, 4H), 2.68–2.57 (m, 2H), 2.22–1.96 (m, 6H), 1.88–1.71 (m, 6H), 1.50–1.25 (m, 8H); HRMS (ESI)  $m/z$  calcd for  $C_{45}H_{57}N_4O_2^+$  ( $[M + H]^+$ ) 685.4476, found:  $m/z$ : 685.4464.

#### **C8-CD2**

$^1H$  NMR (600 MHz,  $CDCl_3$ )  $\delta$  8.00 (d,  $J = 7.6$  Hz, 2H), 7.65 (d,  $J = 7.6$  Hz, 2H), 7.57 (s, 2H), 7.19 (t,  $J = 7.6$  Hz, 2H), 6.92 (t,  $J = 7.6$  Hz, 2H), 6.38–6.27 (m, 2H), 5.48 (ddd,  $J = 17.2, 10.3, 7.6$  Hz, 2H), 4.95 (d,  $J = 17.2$  Hz, 2H), 4.94 (d,  $J = 10.3$  Hz, 2H), 4.50–4.33 (m, 2H), 3.46–3.20 (m, 4H), 3.14–2.85 (m, 6H), 2.65–2.58 (m, 2H), 2.24–1.54 (m, 12H), 1.46–0.88 (m, 12H); HRMS (ESI)  $m/z$  calcd for  $C_{46}H_{59}N_4O_2^+$  ( $[M + H]^+$ ) 699.4633, found:  $m/z$ : 699.4634.

#### **C14-CD2**

$^1H$  NMR (600 MHz,  $CDCl_3$ )  $\delta$  7.93 (d,  $J = 7.6$  Hz, 2H), 7.66 (d,  $J = 7.6$  Hz, 2H), 7.56 (s, 2H), 7.20 (t,  $J = 7.6$  Hz, 2H), 6.88 (t,  $J = 7.6$  Hz, 2H), 6.35–6.28 (m, 2H), 5.48 (ddd,  $J = 17.2, 9.6, 6.9$  Hz, 2H), 4.95 (d,  $J = 17.2$  Hz, 2H), 4.95 (d,  $J = 9.6$  Hz, 2H), 4.54–4.42 (m, 2H), 3.41 (t,  $J = 12.4$  Hz, 2H), 3.29 (t,  $J = 8.3$  Hz, 2H), 3.09–2.97 (m, 4H), 2.88 (t,  $J = 8.3$  Hz, 2H), 2.67–2.58 (m, 2H), 2.26–2.15 (m, 2H), 2.15–2.04 (m, 2H), 2.02–1.97 (m, 2H), 1.82–1.71 (m, 6H), 1.44–1.12 (m, 24H); HRMS (ESI)  $m/z$  calcd for  $C_{52}H_{71}N_4O_2^+$  ( $[M + H]^+$ ) 783.5572, found:  $m/z$ : 783.5569.

#### **Scheme 4**

##### **C2-Q2**

$^1H$  NMR (600 MHz,  $CDCl_3$ )  $\delta$  8.85 (d,  $J = 4.1$  Hz, 2H), 8.07 (d,  $J = 8.3$  Hz, 2H), 7.96 (d,  $J = 8.3$  Hz, 2H), 7.63 (t,  $J = 8.3$  Hz, 2H), 7.56 (d,  $J = 4.1$  Hz, 2H), 7.38 (t,  $J = 8.3$  Hz, 2H), 5.67–5.62 (m, 2H), 4.04 (dt,  $J = 11.0, 6.2$  Hz, 2H), 3.97 (dt,  $J = 11.0, 6.2$  Hz, 2H), 3.59–3.30 (m, 4H), 3.14–3.02 (m, 4H), 2.68–2.38 (m, 8H), 1.93–1.35 (m, 14H); HRMS (ESI)  $m/z$  calcd for  $C_{42}H_{51}N_4O_6^+$  ( $[M + H]^+$ ) 707.3803, found:  $m/z$ : 707.3797.

##### **C6-Q2**

$^1H$  NMR (600 MHz,  $CDCl_3$ )  $\delta$  8.70 (d,  $J = 4.1$  Hz, 2H), 7.96 (d,  $J = 8.3$  Hz, 2H), 7.90 (d,  $J = 8.3$  Hz, 2H), 7.55 (d,  $J = 4.1$  Hz, 2H), 7.52 (t,  $J = 8.3$  Hz, 2H), 7.23 (t,  $J = 8.3$  Hz, 2H), 5.80–5.70 (m, 2H), 3.90 (t,  $J = 6.9$  Hz, 4H), 3.67–3.52 (m, 2H), 3.02 (t,  $J = 11.0$  Hz, 4H), 2.62–2.49 (m, 2H), 2.44–2.31 (m, 2H), 2.17 (t,  $J = 6.9$  Hz, 4H), 1.88–1.67 (m, 6H), 1.65–1.57 (m, 2H), 1.53–1.15 (m, 16H); HRMS (ESI)  $m/z$  calcd for  $C_{46}H_{59}N_4O_6^+$  ( $[M + H]^+$ ) 763.4429, found:  $m/z$ : 763.4429.

##### **C18-Q2**

$^1H$  NMR (600 MHz,  $CDCl_3$ )  $\delta$  8.69 (d,  $J = 4.1$  Hz, 2H), 7.99 (d,  $J = 8.3$  Hz, 2H), 7.87 (d,  $J = 8.3$  Hz,

2H), 7.56 (t,  $J = 8.3$  Hz, 2H), 7.54 (d,  $J = 4.1$  Hz, 2H), 7.23 (t,  $J = 8.3$  Hz, 2H), 5.68–5.61 (m, 2H), 3.92 (t,  $J = 6.2$  Hz, 4H), 3.58–3.48 (m, 2H), 2.99 (t,  $J = 11.0$  Hz, 4H), 2.56–2.48 (m, 2H), 2.39–2.31 (m, 2H), 2.19 (t,  $J = 7.6$  Hz, 4H), 1.83–1.67 (m, 6H), 1.62–1.13 (m, 42H); HRMS (ESI)  $m/z$  calcd for  $C_{58}H_{83}N_4O_6^+$  ( $[M + H]^+$ ) 931.6307, found:  $m/z$ : 931.6298.

## Scheme 5

### *o*-Ph-CD2

$^1H$  NMR (600 MHz,  $CDCl_3$ )  $\delta$  8.04 (d,  $J = 8.3$  Hz, 2H), 8.01 (d,  $J = 8.3$  Hz, 2H), 7.60 (t,  $J = 8.3$  Hz, 2H), 7.44 (t,  $J = 8.3$  Hz, 2H), 7.35–7.27 (m, 2H), 7.16–7.10 (m, 2H), 7.09–7.04 (m, 2H), 5.68–5.55 (m, 4H), 4.90 (d,  $J = 17.2$  Hz, 2H), 4.86 (d,  $J = 11.0$  Hz, 2H), 3.50–3.36 (m, 2H), 3.25–2.97 (m, 12H), 2.68–2.51 (m, 4H), 2.27–2.18 (m, 2H), 1.77–1.49 (m, 6H), 1.48–1.35 (m, 4H); HRMS (ESI)  $m/z$  calcd for  $C_{48}H_{55}N_4O_2^+$  ( $[M + H]^+$ ) 719.4320, found:  $m/z$ : 719.4318.

### *m*-Ph-CD2

$^1H$  NMR (600 MHz,  $CDCl_3$ )  $\delta$  8.02 (d,  $J = 7.6$  Hz, 2H), 8.00 (d,  $J = 7.6$  Hz, 2H), 7.58 (t,  $J = 7.6$  Hz, 2H), 7.36 (t,  $J = 7.6$  Hz, 2H), 7.27 (s, 2H), 7.00 (t,  $J = 7.6$  Hz, 1H), 6.85 (d,  $J = 7.6$  Hz, 2H), 6.68 (s, 1H), 5.74–5.67 (m, 2H), 5.64 (ddd,  $J = 17.2, 10.3, 7.6$  Hz, 2H), 4.91 (d,  $J = 17.2$  Hz, 2H), 4.86 (d,  $J = 10.3$  Hz, 2H), 3.65–3.49 (m, 2H), 3.15–2.87 (m, 12H), 2.71–2.55 (m, 4H), 2.29–2.20 (m, 2H), 1.82–1.68 (m, 6H), 1.49–1.39 (m, 2H), 1.35–1.26 (m, 2H); HRMS (ESI)  $m/z$  calcd for  $C_{48}H_{55}N_4O_2^+$  ( $[M + H]^+$ ) 719.4320, found:  $m/z$ : 719.4319.

### *p*-Ph-CD2

$^1H$  NMR (600 MHz,  $CDCl_3$ )  $\delta$  8.03 (d,  $J = 7.6$  Hz, 2H), 7.97 (d,  $J = 7.6$  Hz, 2H), 7.62 (t,  $J = 7.6$  Hz, 2H), 7.48–7.40 (m, 2H), 7.27 (s, 2H), 7.07–7.02 (m, 4H), 5.69 (ddd,  $J = 17.2, 10.3, 7.6$  Hz, 2H), 5.65–5.56 (m, 2H), 4.94 (d,  $J = 17.2$  Hz, 2H), 4.91 (d,  $J = 10.3$  Hz, 2H), 3.52–3.39 (m, 2H), 3.25 (t,  $J = 7.6$  Hz, 4H), 3.17–3.04 (m, 8H), 2.75–2.62 (m, 4H), 2.32–2.23 (m, 2H), 1.85–1.39 (m, 10H); HRMS (ESI)  $m/z$  calcd for  $C_{48}H_{55}N_4O_2^+$  ( $[M + H]^+$ ) 719.4320, found:  $m/z$ : 719.4321.

## Scheme 6

### *o*-Ph-Q2

$^1H$  NMR (600 MHz,  $CDCl_3$ )  $\delta$  8.62 (d,  $J = 4.1$  Hz, 2H), 7.94 (d,  $J = 7.6$  Hz, 2H), 7.88 (d,  $J = 7.6$  Hz, 2H), 7.59–7.39 (m, 8H), 7.18 (t,  $J = 7.6$  Hz, 2H), 5.72–5.58 (m, 2H), 4.06 (t,  $J = 6.2$  Hz, 4H), 3.58–3.43 (m, 2H), 3.04–2.85 (m, 4H), 2.48–2.23 (m, 4H), 1.83–1.20 (m, 16H); HRMS (ESI)  $m/z$  calcd for  $C_{46}H_{51}N_4O_6^+$  ( $[M + H]^+$ ) 755.3803, found:  $m/z$ : 755.3800.

### *m*-Ph-Q2

$^1\text{H}$  NMR (600 MHz,  $\text{CDCl}_3$ )  $\delta$  8.62 (d,  $J = 4.1$  Hz, 2H), 8.46 (s, 1H), 8.07 (d,  $J = 8.3$  Hz, 2H), 7.93 (d,  $J = 8.3$  Hz, 2H), 7.90 (d,  $J = 8.3$  Hz, 2H), 7.54 (d,  $J = 4.1$  Hz, 2H), 7.48 (t,  $J = 8.3$  Hz, 2H), 7.41 (t,  $J = 8.3$  Hz, 2H), 7.20 (t,  $J = 8.3$  Hz, 2H), 5.77–5.68 (m, 2H), 4.26–4.06 (m, 4H), 3.70–3.48 (m, 2H), 3.06–2.94 (m, 4H), 2.54–2.30 (m, 4H), 2.00–1.26 (m, 16H); HRMS (ESI)  $m/z$  calcd for  $\text{C}_{46}\text{H}_{51}\text{N}_4\text{O}_6^+$  ( $[\text{M} + \text{H}]^+$ ) 755.3803, found:  $m/z$ : 755.3802.

#### ***p*-Ph-Q2**

$^1\text{H}$  NMR (600 MHz,  $\text{CDCl}_3$ )  $\delta$  8.78 (d,  $J = 4.1$  Hz, 2H), 8.03 (s, 4H), 7.99 (d,  $J = 8.3$  Hz, 2H), 7.71 (d,  $J = 4.1$  Hz, 2H), 7.67 (d,  $J = 8.3$  Hz, 2H), 7.19 (t,  $J = 8.3$  Hz, 2H), 6.84 (t,  $J = 8.3$  Hz, 2H), 6.41–6.37 (m, 2H), 4.62–4.52 (m, 2H), 4.39–4.17 (m, 4H), 3.66–3.56 (m, 2H), 3.42–3.20 (m, 6H), 3.03–2.91 (m, 2H), 2.39–2.05 (m, 8H), 1.96–0.93 (m, 6H); HRMS (ESI)  $m/z$  calcd for  $\text{C}_{46}\text{H}_{51}\text{N}_4\text{O}_6^+$  ( $[\text{M} + \text{H}]^+$ ) 755.3803, found:  $m/z$ : 755.3801.

### **Scheme 7**

#### **Py-CD2**

$^1\text{H}$  NMR (600 MHz,  $\text{CDCl}_3$ )  $\delta$  8.20 (d,  $J = 8.3$  Hz, 2H), 7.85 (d,  $J = 8.3$  Hz, 2H), 7.61 (s, 2H), 7.53 (t,  $J = 8.3$  Hz, 2H), 7.41 (t,  $J = 8.3$  Hz, 2H), 7.31 (t,  $J = 8.3$  Hz, 1H), 6.81 (d,  $J = 8.3$  Hz, 2H), 6.14–5.99 (m, 2H), 5.56 (ddd,  $J = 16.5, 9.6, 6.2$  Hz, 2H), 4.91 (d,  $J = 16.5$  Hz, 2H), 4.88 (d,  $J = 9.6$  Hz, 2H), 3.88–3.73 (m, 2H), 3.24–2.97 (m, 12H), 2.82–2.72 (m, 2H), 2.68–2.53 (m, 2H), 2.42–2.27 (m, 2H), 1.92–1.74 (m, 6H), 1.56–1.44 (m, 2H), 1.28–1.18 (m, 2H); HRMS (ESI)  $m/z$  calcd for  $\text{C}_{47}\text{H}_{54}\text{N}_5\text{O}_2^+$  ( $[\text{M} + \text{H}]^+$ ) 720.4272, found:  $m/z$ : 720.4280.

#### **Biph-CD2**

$^1\text{H}$  NMR (600 MHz,  $\text{CDCl}_3$ )  $\delta$  8.01 (d,  $J = 7.6$  Hz, 2H), 7.91 (d,  $J = 7.6$  Hz, 2H), 7.46 (t,  $J = 7.6$  Hz, 2H), 7.40 (d,  $J = 7.6$  Hz, 4H), 7.32 (s, 2H), 7.19 (d,  $J = 7.6$  Hz, 6H), 6.17–6.07 (m, 2H), 5.48 (ddd,  $J = 17.2, 9.6, 7.6$  Hz, 2H), 4.90 (d,  $J = 17.2$  Hz, 2H), 4.90 (d,  $J = 9.6$  Hz, 2H), 4.05–3.92 (m, 2H), 3.32–3.26 (m, 6H), 3.23–3.10 (m, 6H), 2.94–2.81 (m, 4H), 2.47–2.34 (m, 2H), 2.01–1.52 (m, 8H), 1.29–1.15 (m, 2H); HRMS (ESI)  $m/z$  calcd for  $\text{C}_{54}\text{H}_{59}\text{N}_4\text{O}_2^+$  ( $[\text{M} + \text{H}]^+$ ) 795.4633, found:  $m/z$ : 795.4630.

### **Scheme 8**

#### **Ph-CD3**

$^1\text{H}$  NMR (600 MHz,  $\text{CDCl}_3$ )  $\delta$  8.14 (d,  $J = 7.6$  Hz, 3H), 7.98 (d,  $J = 7.6$  Hz, 3H), 7.56 (t,  $J = 7.6$  Hz, 3H), 7.40 (t,  $J = 7.6$  Hz, 3H), 7.33 (s, 3H), 6.58 (s, 3H), 5.98–5.77 (m, 3H), 5.66 (ddd,  $J = 17.2, 9.6, 7.6$  Hz, 3H), 4.95 (d,  $J = 17.2$  Hz, 3H), 4.91 (d,  $J = 9.6$  Hz, 3H), 3.79–3.58 (m, 3H), 3.22–3.12 (m, 6H), 3.00–2.93 (m, 6H), 2.88–2.69 (m, 12H), 2.43–2.29 (m, 3H), 1.91–1.72 (m, 9H), 1.60–1.38 (m, 6H); HRMS (ESI)  $m/z$  calcd for  $\text{C}_{69}\text{H}_{79}\text{N}_6\text{O}_3^+$  ( $[\text{M} + \text{H}]^+$ ) 1039.6208, found:  $m/z$ : 1039.6212.



**Alkyl-CD3**

$^1\text{H}$  NMR (600 MHz,  $\text{CDCl}_3$ )  $\delta$  8.02 (d,  $J = 7.6$  Hz, 3H), 7.96 (d,  $J = 7.6$  Hz, 3H), 7.55 (t,  $J = 7.6$  Hz, 3H), 7.47 (s, 3H), 7.39 (t,  $J = 7.6$  Hz, 3H), 5.87–5.71 (m, 3H), 5.64 (ddd,  $J = 17.2, 9.6, 7.6$  Hz, 3H), 4.91 (d,  $J = 17.2$  Hz, 3H), 4.88 (d,  $J = 9.6$  Hz, 3H), 3.59–3.41 (m, 3H), 3.20–2.99 (m, 6H), 2.90–2.48 (m, 12H), 2.31–2.17 (m, 3H), 1.88–1.09 (m, 28H); HRMS (ESI)  $m/z$  calcd for  $\text{C}_{67}\text{H}_{83}\text{N}_6\text{O}_3^+$  ( $[\text{M} + \text{H}]^+$ ) 1019.6521, found:  $m/z$ : 1019.6526.

**Ph-Q3**

$^1\text{H}$  NMR (600 MHz,  $\text{CDCl}_3$ )  $\delta$  8.80 (d,  $J = 4.1$  Hz, 3H), 8.02 (d,  $J = 8.3$  Hz, 3H), 7.97 (d,  $J = 8.3$  Hz, 3H), 7.58 (t,  $J = 8.3$  Hz, 3H), 7.54 (d,  $J = 4.1$  Hz, 3H), 7.33 (t,  $J = 8.3$  Hz, 3H), 7.01 (s, 3H), 5.75–5.64 (m, 3H), 4.03–3.89 (m, 6H), 3.55–3.47 (m, 6H), 3.17–2.98 (m, 6H), 2.68–2.54 (m, 3H), 2.43–2.32 (m, 3H), 2.01–1.32 (m, 27H); HRMS (ESI)  $m/z$  calcd for  $\text{C}_{69}\text{H}_{79}\text{N}_6\text{O}_9^+$  ( $[\text{M} + \text{H}]^+$ ) 1135.5903, found:  $m/z$ : 1135.5892.
